# Supplementary material for: Durable dielectric switching and photo-responsivity in a Dion–Jacobson hybrid perovskite semiconductor
Source: Royal Society of Chemistry journal article supplement (doi:10.1039/d3qi02685j), 2024-01-01
Supplement: d3qi02685j1.pdf [file d3qi02685j1.pdf]

## Supporting Information

### **Durable Dielectric Switching and Photo-responsivity in a Dion–Jacobson Hybrid Perovskite Semiconductor**

*Peng Wang,<sup>a,b</sup> Xinling Li,<sup>a,b</sup> Huang Ye,<sup>b,d</sup> Qianwen Guan,<sup>b,d</sup> Yifei Wang,<sup>b,d</sup> Yaru Geng,<sup>b</sup> Chengshu Zhang,<sup>b,d</sup> Hang Li,<sup>b,d</sup> and Junhua Luo<sup>\*a,b,c,d</sup>*

<sup>a</sup> College of Chemistry, Fuzhou University, Fuzhou 350116, China

<sup>b</sup> State Key Laboratory of Structure Chemistry, Fujian Institute of Research on the Structure of Matter, Chinese Academy of Sciences, Fuzhou, Fujian, 350002, P. R. China. Email: [jhluo@fjirsm.ac.cn](mailto:jhluo@fjirsm.ac.cn)

<sup>c</sup> Key Laboratory of Fluorine and Silicon for Energy Materials and Chemistry of Ministry of Education, School of Chemistry and Chemical Engineering, Jiangxi Normal University, Nanchang, Jiangxi 330022, China.

<sup>d</sup> University of Chinese Academy of Sciences, Beijing, 100049, China.

## Experimental Section

**Materials:** Lead (II) acetate trihydrate ( $\text{Pb}(\text{AC})_2 \cdot 3\text{H}_2\text{O}$ , 99.5%, AR), hydrobromic acid (HBr, 48%), 1,4-butanediamine (BDA, 98%), methylamine (MA, 30% in  $\text{H}_2\text{O}$ ) are used as received from Aladdin without further purification.

**Synthesis and crystal growth:** MA (5 mmol, 0.4g) and  $\text{Pb}(\text{Ac})_2 \cdot 3\text{H}_2\text{O}$  (10 mmol, 3.67 g) were dissolved in 20 ml of hydrobromic acid with stirring for 10 minutes at room temperature. Then 1,4-butanediamine (10 mmol, 0.810g) was added to the mixed solution until the precipitate was completely dissolved by heating. The yellow transparent crystals of **1** were obtained after 24 h. Meanwhile, bulk single crystals were grown by the temperature-cooling method from its saturated solution at a rate of  $0.2 \text{ K d}^{-1}$ .

**Single crystal structure determination and Powder X-ray diffraction:** Single crystal X-ray diffraction (XRD) experiments were performed on a Bruker APEX-II diffractometer with Mo  $K\alpha$  radiation, operating at 50 kV and 40 mA. The structures were solved by direct method and refined by full-matrix least-squares on F2 using the SHELX package. The structure-solving and refinement processes were conducted in the Olex2 software. Powder X-ray diffraction (PXRD) data was obtained by Rigaku Miniflex600 powder X-ray diffractometer with the  $2\theta$  range of  $5^\circ$ - $50^\circ$  at room temperature.

**Thermal analyses:** The thermogravimetric analysis data were obtained by using Mettler Toledo TGA/SDTA 851e. Differential scanning calorimetry (DSC) analysis was performed on NETZSCH DSC 200 F3 equipment within the temperature range of 250-375 K. The measurement was performed in a nitrogen atmosphere with a scanning rate of  $10 \text{ K min}^{-1}$ .

**Dielectric constant measurements:** The pressed-powder pellets and bulk crystals coated with silver conduction paste of **1** were employed for the dielectric experiments. The TH2828A Precision LCR meter was used to conduct the variable-temperature dielectric measurements within the respective frequency of 10 kHz, 100 kHz, 300 kHz, 500 kHz, and 1000 kHz, and the temperature range of 235–350 K.

**UV–Vis–NIR Diffuse Reflectance Spectroscopy:** UV-vis diffuse reflectance spectra of desired materials were performed at room temperature on Perkin-Elmer Lambda 900 UV-vis spectrophotometer in the variable wavelength range between 250 to 800 nm. The anhydrous BaSO<sub>4</sub> powder was used as the 100% reflectance reference, and the powdered crystal was used for the measurements.

**Computational description:** The crystal structural data at LTP of **1** was used for the first-principles density functional theory (DFT) calculations. Partial density of states (PDOS) and band structure were calculated by the total-energy code CASTEP. Under the generalized gradient approximation, the Kleinman-Bylander form of norm-conserving pseudopotentials was employed to model interactions between ionic cores and electrons. The high cut-off energy of 820 eV and the k-point sampling of the Brillouin zone of  $2 \times 2 \times 1$  were set for **1**, respectively. The following orbital electrons were treated as valence electrons: Pb  $6s^26p^2$ , Br  $4s^24p^5$ , C  $2s^22p^2$ , N  $2s^22p^3$ , and H  $1s^1$ .

**Photodetection property measurements:** The temperature-dependent conductivity of **1** was measured along the *a*-, *b*-, and *c*-axis crystal direction ranging from 300 to 400 K. During photoelectric measurement, the *I-V* curves of the detectors were measured under the light of 405 nm. (LP405-MF300) serves as the light source, and a PM100D optical power meter is used to measure the light intensity. A Keithley 6517B source meter was installed on the device and the photo-response was measured in the visible light range at room temperature. The response time was recorded using a high-speed Tektronix DS1052E oscilloscope.

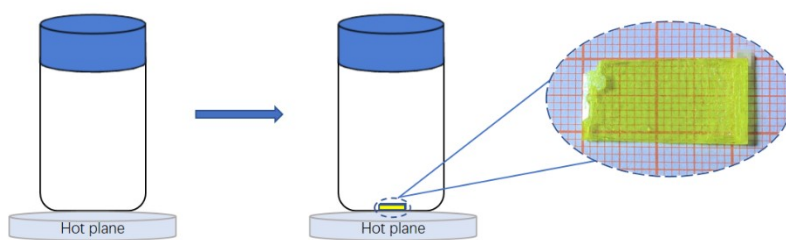

Fig S1. A schematic showing the growth of single crystals.

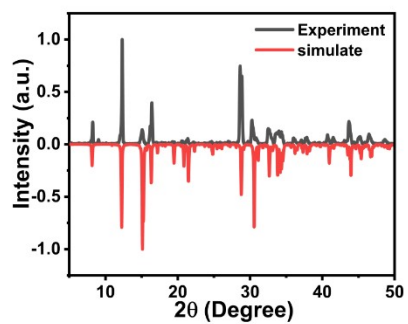

Fig S2. Experimental and simulated powder X-ray diffraction patterns for **1**.

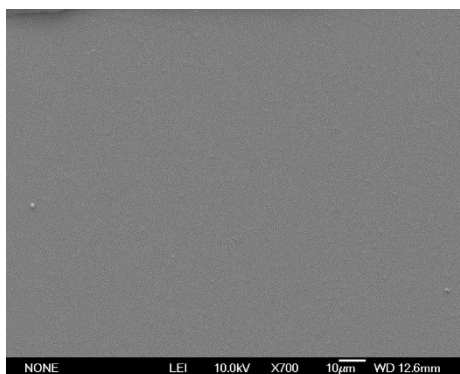

Fig S3. SEM image of **1**.

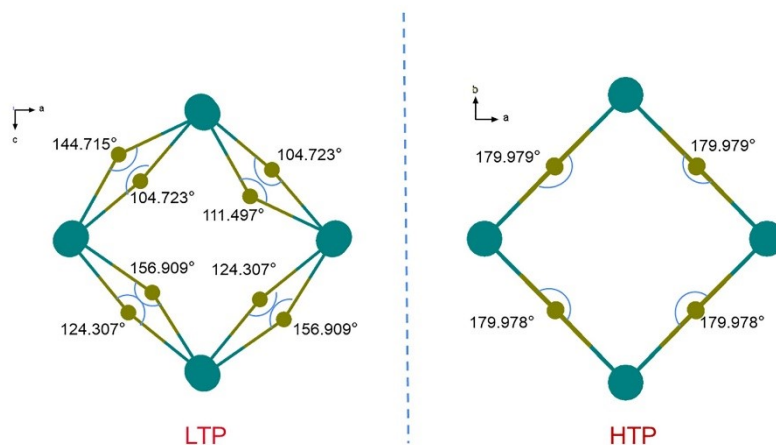

Fig S4. The equatorial angles of the inorganic layer in **1**.

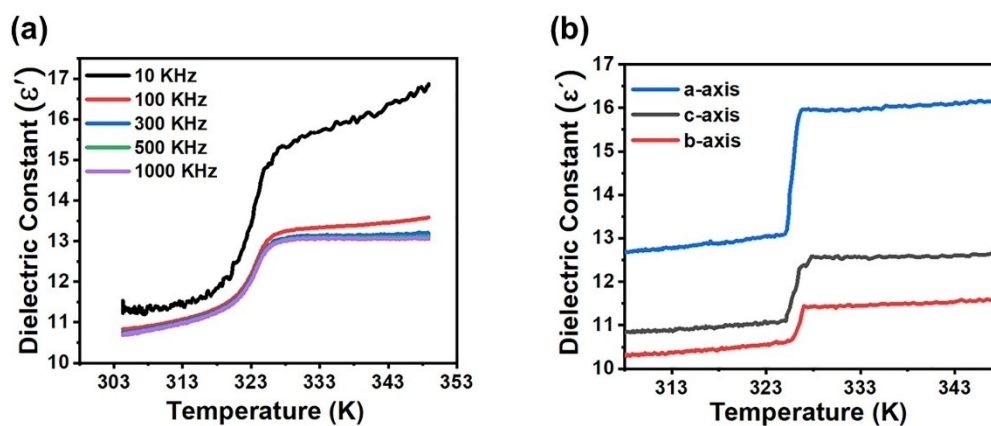

Fig S5. (a) The dielectric constant curves of **1** under different frequency. (b) Dielectric constants curves of **1** measured along the *a*-, *b*- and *c*-axis at 1000 KHz.

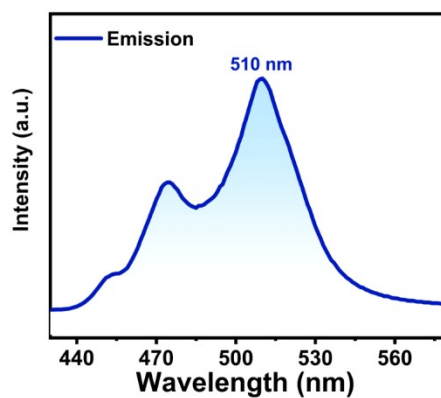

Fig S6. PL spectra of **1**.

**Table S1.** Crystal data and structure refinements for **1** collected at LTP and HTP.

|                                                      |                                                                                |                                                                                |
|------------------------------------------------------|--------------------------------------------------------------------------------|--------------------------------------------------------------------------------|
| Empirical formula                                    | C <sub>6</sub> H <sub>26</sub> Br <sub>10</sub> N <sub>4</sub> Pb <sub>3</sub> | C <sub>6</sub> H <sub>26</sub> Br <sub>10</sub> N <sub>4</sub> Pb <sub>3</sub> |
| Formula weight                                       | 1574.98                                                                        | 1574.98                                                                        |
| Temperature [K]                                      | 297.34(10)                                                                     | 343.02                                                                         |
| Crystal system                                       | orthorhombic                                                                   | orthorhombic                                                                   |
| Space group (number)                                 | <i>Pnma</i>                                                                    | <i>Cmcm</i>                                                                    |
| <i>a</i> [Å]                                         | 8.3682(5)                                                                      | 8.3213(4)                                                                      |
| <i>b</i> [Å]                                         | 43.331(3)                                                                      | 8.4780(6)                                                                      |
| <i>c</i> [Å]                                         | 8.3003(5)                                                                      | 42.894(3)                                                                      |
| $\alpha$ [°]                                         | 90                                                                             | 90                                                                             |
| $\beta$ [°]                                          | 90                                                                             | 90                                                                             |
| $\gamma$ [°]                                         | 90                                                                             | 90                                                                             |
| Volume [Å <sup>3</sup> ]                             | 3009.7(3)                                                                      | 3026.1(3)                                                                      |
| <i>Z</i>                                             | 4                                                                              | 4                                                                              |
| $\rho_{\text{calc}}$ [gcm <sup>-3</sup> ]            | 3.476                                                                          | 3.457                                                                          |
| $\mu$ [mm <sup>-1</sup> ]                            | 30.018                                                                         | 29.855                                                                         |
| <i>F</i> (000)                                       | 2744.0                                                                         | 2744.0                                                                         |
| Radiation                                            | Mo <i>K</i> <sub>α</sub> (λ=0.71073 Å)                                         | Mo <i>K</i> <sub>α</sub> (λ=0.71073 Å)                                         |
| 2θ range [°]                                         | 4.996 to 60.894                                                                | 7.12 to 55.006                                                                 |
| Index ranges                                         | -8 ≤ <i>h</i> ≤ 11,<br>-54 ≤ <i>k</i> ≤ 45,<br>-10 ≤ <i>l</i> ≤ 10             | -10 ≤ <i>h</i> ≤ 10,<br>-11 ≤ <i>k</i> ≤ 10,<br>-55 ≤ <i>l</i> ≤ 55            |
| Reflections collected                                | 15044                                                                          | 12113                                                                          |
| Independent reflections                              | 3702 [R <sub>int</sub> = 0.0686, R <sub>sigma</sub> = 0.0521]                  | 1879 [R <sub>int</sub> = 0.0658, R <sub>sigma</sub> = 0.0504]                  |
| Data/restraints/parameters                           | 3702/0/113                                                                     | 1879/40/90                                                                     |
| Goodness-of-fit on <i>F</i> <sup>2</sup>             | 1.077                                                                          | 1.107                                                                          |
| Final <i>R</i> indexes [ <i>I</i> ≥ 2σ ( <i>I</i> )] | R <sub>1</sub> = 0.0611, wR <sub>2</sub> = 0.1450                              | R <sub>1</sub> = 0.0592, wR <sub>2</sub> = 0.1697                              |
| Final <i>R</i> indexes [all data]                    | R <sub>1</sub> = 0.0803, wR <sub>2</sub> = 0.1562                              | R <sub>1</sub> = 0.0791, wR <sub>2</sub> = 0.1851                              |
| Largest diff. peak/hole / e Å <sup>-3</sup>          | 2.31/-3.37                                                                     | 2.87/-2.72                                                                     |

**Table S2.** The bond lengths of **1** at LTP and HTP.

|                       | LTP        |                       | HTP        |
|-----------------------|------------|-----------------------|------------|
| Pb1–Br6               | 2.8415(14) | Pb1–Br2 <sup>#1</sup> | 2.954(3)   |
| Pb1–Br4 <sup>#1</sup> | 2.9755(13) | Pb1–Br2               | 2.954(3)   |
| Pb1–Br4               | 2.9716(14) | Pb1–Br1               | 2.973(3)   |
| Pb1–Br5 <sup>#2</sup> | 2.9877(14) | Pb1–Br1 <sup>#2</sup> | 2.967(3)   |
| Pb1–Br5               | 2.9797(13) | Pb1–Br1 <sup>#3</sup> | 2.967(3)   |
| Pb1–Br3               | 3.1531(14) | Pb1–Br1 <sup>#4</sup> | 2.973(3)   |
| Pb2–Br1 <sup>#3</sup> | 3.0730(19) | Pb2–Br2               | 3.093(3)   |
| Pb2–Br1               | 3.0649(19) | Pb2–Br3               | 2.969(2)   |
| Pb2–Br2 <sup>#2</sup> | 2.986(2)   | Pb2–Br3 <sup>#5</sup> | 2.971(2)   |
| Pb2–Br2               | 2.9924(19) | Pb2–Br3 <sup>#6</sup> | 2.9695(19) |
| Pb2–Br3               | 2.9682(13) | Pb2–Br3 <sup>#3</sup> | 2.971(2)   |
| Pb2–Br3 <sup>#4</sup> | 2.9682(13) | Pb2–Br4               | 2.868(4)   |

**Table S3.** The bond angles of **1** at LTP.

| Atom–Atom–Atom | Angle [°]  | Atom–Atom–Atom | Angle [°] |
|----------------|------------|----------------|-----------|
| Br6–Pb1–Br4    | 89.51(5)   | Br2–Pb2–Br1    | 172.78(6) |
| Br6–Pb1–Br4    | 87.34(5)   | Br2–Pb2–Br1    | 178.06(6) |
| Br6–Pb1–Br5    | 90.75(5)   | Br2–Pb2–Br2    | 93.16(2)  |
| Br6–Pb1–Br5    | 88.35(5)   | Br3–Pb2–Br1    | 91.34(4)  |
| Br6–Pb1–Br3    | 167.97(5)  | Br3–Pb2–Br1    | 85.74(3)  |
| Br4–Pb1–Br4    | 89.862(13) | Br3–Pb2–Br1    | 85.74(3)  |
| Br4–Pb1–Br5    | 177.74(5)  | Br3–Pb2–Br1    | 91.34(4)  |
| Br4–Pb1–Br5    | 89.32(5)   | Br3–Pb2–Br2    | 94.21(3)  |
| Br4–Pb1–Br5    | 91.43(5)   | Br3–Pb2–Br2    | 88.13(4)  |
| Br4–Pb1–Br5    | 177.69(5)  | Br3–Pb2–Br2    | 88.13(4)  |
| Br4–Pb1–Br3    | 82.36(5)   | Br3–Pb2–Br2    | 94.21(3)  |
| Br4–Pb1–Br3    | 84.27(4)   | Br3–Pb2–Br3    | 170.97(7) |
| Br5–Pb1–Br5    | 89.324(14) | Pb2–Br1–Pb2    | 158.24(8) |
| Br5–Pb1–Br3    | 99.67(5)   | Pb2–Br2–Pb2    | 149.08(9) |
| Br5–Pb1–Br3    | 97.70(5)   | Pb1–Br4–Pb1    | 164.34(7) |
| Br1–Pb2–Br1    | 87.892(19) | Pb1–Br5–Pb1    | 162.12(7) |
| Br2–Pb2–Br1    | 94.05(6)   |                |           |

**Table S4.** The bond angles of **1** at HTP.

| Atom–Atom–Atom | Angle [°]  | Atom–Atom–Atom | Angle [°]  |
|----------------|------------|----------------|------------|
| Br2–Pb1–Br2    | 179.94(17) | Br3–Pb2–Br2    | 90.13(9)   |
| Br2–Pb1–Br1    | 89.98(6)   | Br3–Pb2–Br2    | 90.13(9)   |
| Br2–Pb1–Br1    | 90.02(6)   | Br3–Pb2–Br3    | 178.50(13) |
| Br2–Pb1–Br1    | 89.98(6)   | Br3–Pb2–Br3    | 91.067(5)  |
| Br2–Pb1–Br1    | 90.02(6)   | Br3–Pb2–Br3    | 87.59(11)  |
| Br2–Pb1–Br1    | 89.98(6)   | Br3–Pb2–Br3    | 90.26(11)  |
| Br2–Pb1–Br1    | 90.02(6)   | Br3–Pb2–Br3    | 178.50(13) |
| Br2–Pb1–Br1    | 89.98(6)   | Br3–Pb2–Br3    | 91.067(5)  |
| Br2–Pb1–Br1    | 90.02(6)   | Br4–Pb2–Br2    | 168.91(9)  |
| Br1–Pb1–Br1    | 91.069(5)  | Br4–Pb2–Br3    | 79.38(10)  |
| Br1–Pb1–Br1    | 179.78(16) | Br4–Pb2–Br3    | 99.85(11)  |
| Br1–Pb1–Br1    | 91.069(5)  | Br4–Pb2–Br3    | 93.47(10)  |
| Br1–Pb1–Br1    | 179.78(17) | Br4–Pb2–Br3    | 86.10(10)  |
| Br1–Pb1–Br1    | 88.71(16)  | Pb1–Br2–Pb2    | 179.67(16) |
| Br1–Pb1–Br1    | 89.15(16)  | Pb1–Br1–Pb1    | 179.78(16) |
| Br3–Pb2–Br2    | 90.56(8)   | Pb2–Br3–Pb2    | 178.50(13) |
| Br3–Pb2–Br2    | 90.56(9)   |                |            |
